# Supplementary material for: Time lapse analysis of tumor response in patients with soft tissue sarcoma treated with trabectedin: A pooled analysis of two phase II clinical trials
Source: PubMed Central journal article supplement (PMC7286446; doi:10.1002/cam4.2991), 2020-03-27

BSC (n = 29)

Trabectedin treatment (n = 29)

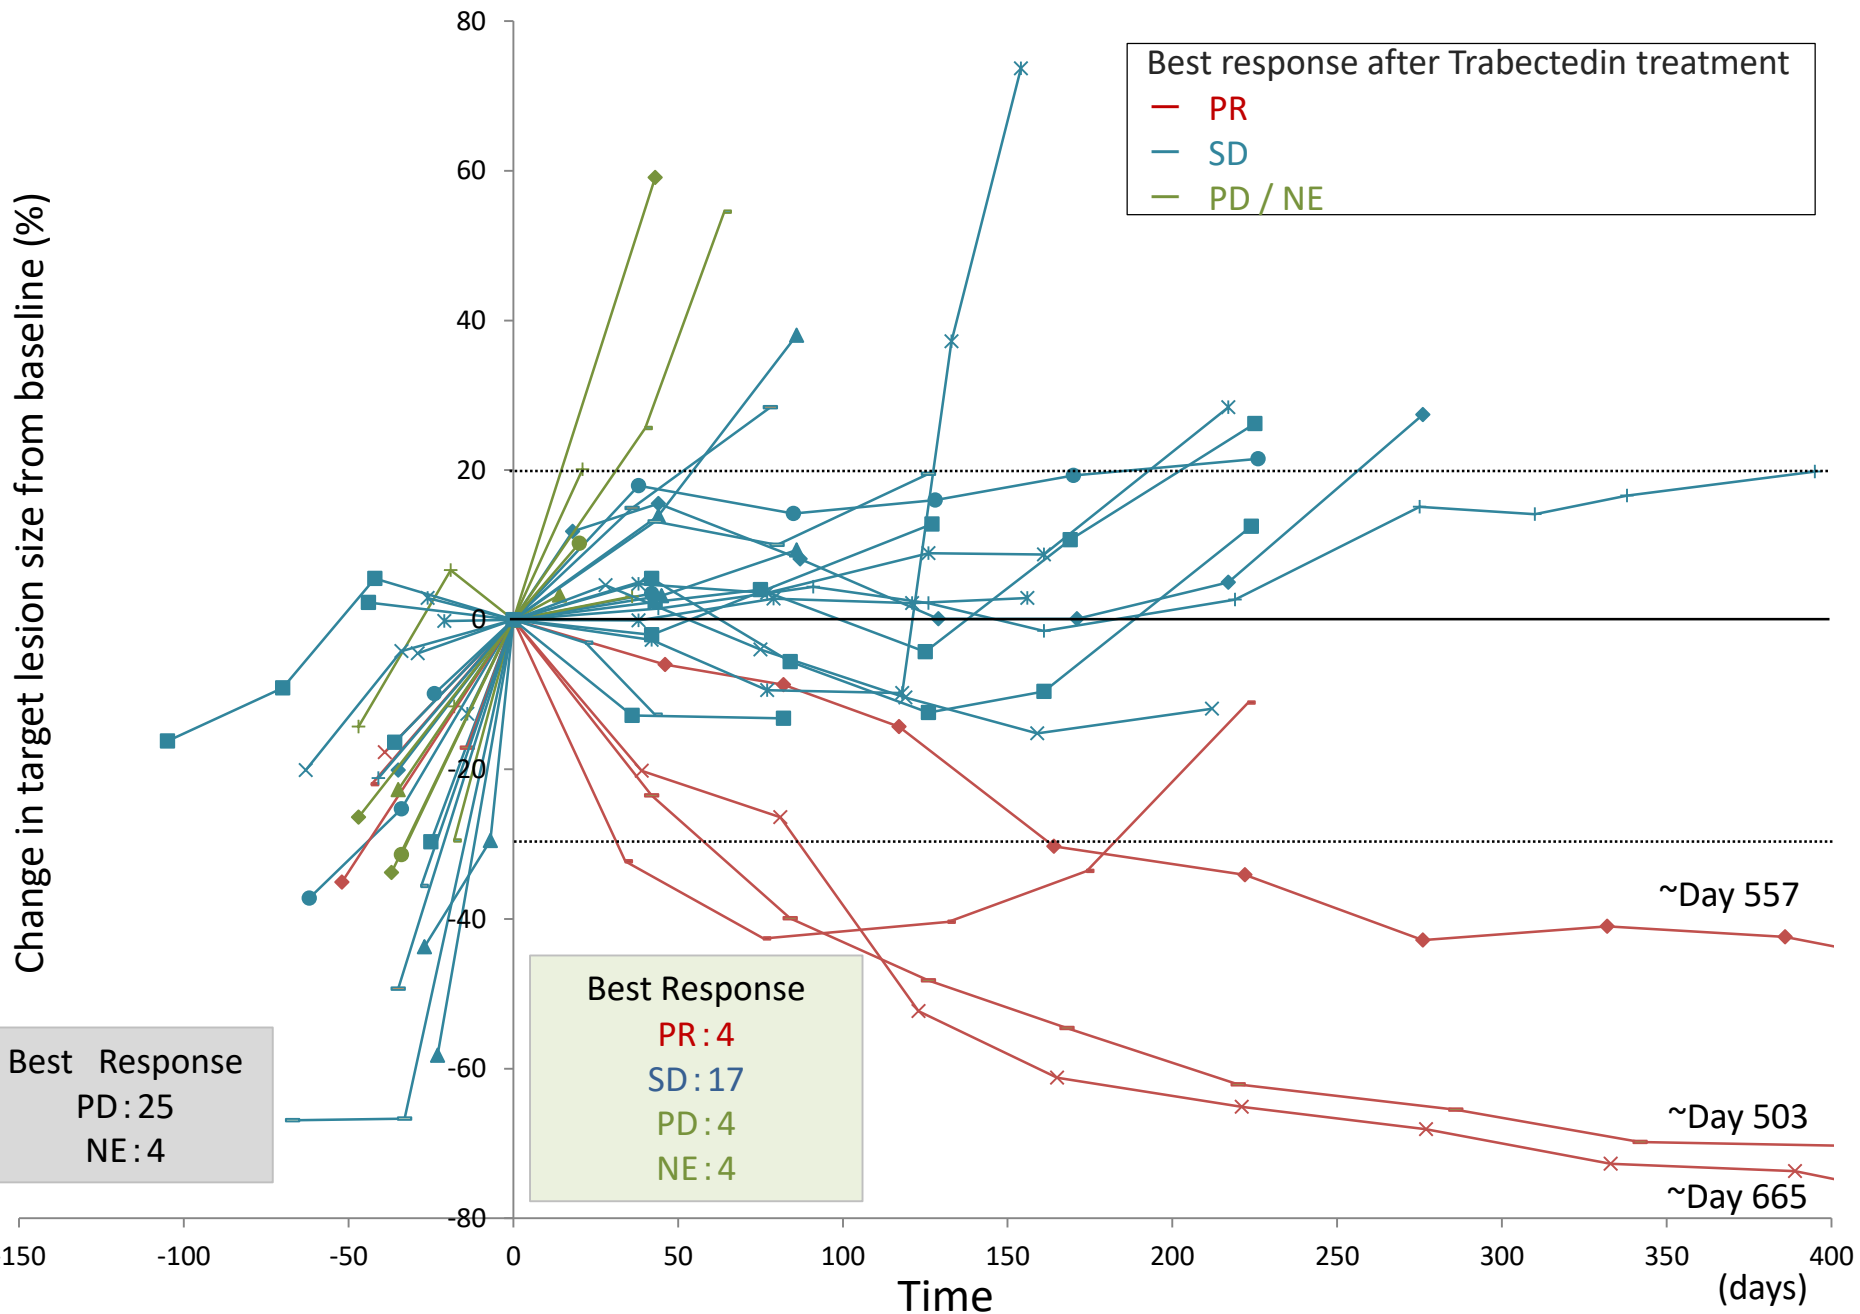

Supplement: CAM4-9-3656-s001.pdf [file CAM4-9-3656-s001.pdf]
